# Supplementary material for: The FUN30 Chromatin Remodeler, Fft3, Protects Centromeric and Subtelomeric Domains from Euchromatin Formation
Source: PLOS journal article supplement (doi:10.1371/journal.pgen.1001334), 2011-03-17
Supplement: S8 (10.1371/journal.pgen.1001334.s008) [file journal.pgen.1001334.s008]

Table S1

| Strain | Genotype | Reference |
| --- | --- | --- |
| Hu1867 | *h+fft3::hph ade6-M210 uraDS/E leu1-32* | This study |
| FY412 | *h+ cc2(SphI)::ura4+ leu1-32 ura4-DS/E ade6-M210* | Allshire *et al. [1]* |
| Hu1321 | *h+ fft3::KanMX6 cc2(SphI):ura4+ leu1-32 ura4-DS/E ade6-M210* | This study |
| Hu199 | *h+ade6-M210/Ch16 ade6-M216 M23::ura4+ leu1-32 ura4-DS/E* | Allshire *et al.* [2] |
| Hu1666 | *h+* *fft3::KanMX4 ade6-M210/Ch16 ade6-M216 M23::ura4+ leu1-32 ura4-* | This study |
| Hu29 | *h- ade6-M210 leu1-32 ura4-D18* | This study |
| FY340 | *h+ TM1::ura random integrant leu1-32 ura4-DS/E ade6-M210* | [1] |
| Hu111 | *h+ leu1-32 ura4-DS/E ade6-Nco* |  |
| Hu1270 | *h+ fft3-myc::KanMX6 leu1-32 ade6-M210 ura4-D18* | This study |
| Hu1824 | *h- pht1-myc::KanMx6 leu1-32 ade6-M210 ura4-D18* | Buchanan et al.[3] |
| Hu1993 | *h- fft3::hph pht1-myc::KanMx6 leu1-32 ade6-M210 ura4-* | This study |
| Hu303 | *h-* |  |

List of strains used in this study

1. Allshire, R.C., et al., *Position effect variegation at fission yeast centromeres.* Cell, 1994. **76**(1): p. 157-69.

2. Allshire, R.C., et al., *Mutations derepressing silent centromeric domains in fission yeast disrupt chromosome segregation.* Genes Dev, 1995. **9**(2): p. 218-33.

3. Buchanan, L., et al., *The Schizosaccharomyces pombe JmjC-protein, Msc1, prevents H2A.Z localization in centromeric and subtelomeric chromatin domains.* PLoS Genet, 2009. **5**(11): p. e1000726.
